# Supplementary material for: Piezoelectric ultrasound energy–harvesting device for deep brain stimulation and analgesia applications
Source: PubMed Central journal article supplement — Sci Adv. 2022 Apr 15;8(15):eabk0159. doi: 10.1126/sciadv.abk0159 (PMC9012468; doi:10.1126/sciadv.abk0159), 2022-04-15
Supplement: sciadv.abk0159_sm.pdf [file sciadv.abk0159_sm.pdf]

Supplementary Materials for  
**Piezoelectric ultrasound energy–harvesting device for deep brain stimulation  
and analgesia applications**

Tao Zhang, Huageng Liang, Zhen Wang, Chaorui Qiu, Yuan Bo Peng, Xinyu Zhu,  
Jiapu Li, Xu Ge, Jianbo Xu, Xian Huang, Junwei Tong, Jun Ou-Yang, Xiaofei Yang, Fei Li\*,  
Benpeng Zhu\*

\*Corresponding author. Email: benpengzhu@hust.edu.cn (B.Z.); ful5@xjtu.edu.cn (F.L.)

Published 15 April 2022, *Sci. Adv.* **8**, eabk0159 (2022)

DOI: 10.1126/sciadv.abk0159

**The PDF file includes:**

Figs. S1 to S19

Tables S1 to S7

Note S1

Legends for movies S1 to S9

**Other Supplementary Material for this manuscript includes the following:**

Movies S1 to S9

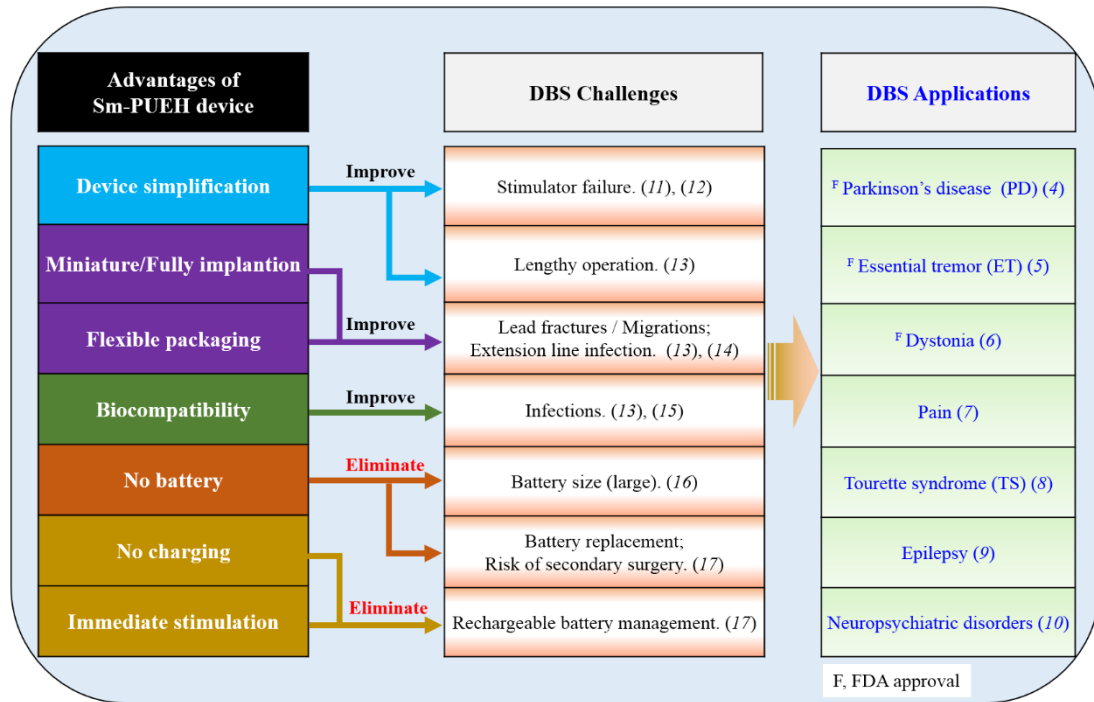

**Fig. S1. The summary of DBS.** DBS applications, challenges proposed, as well as the advantages of this work in dealing with the specific DBS challenges (thin arrows).

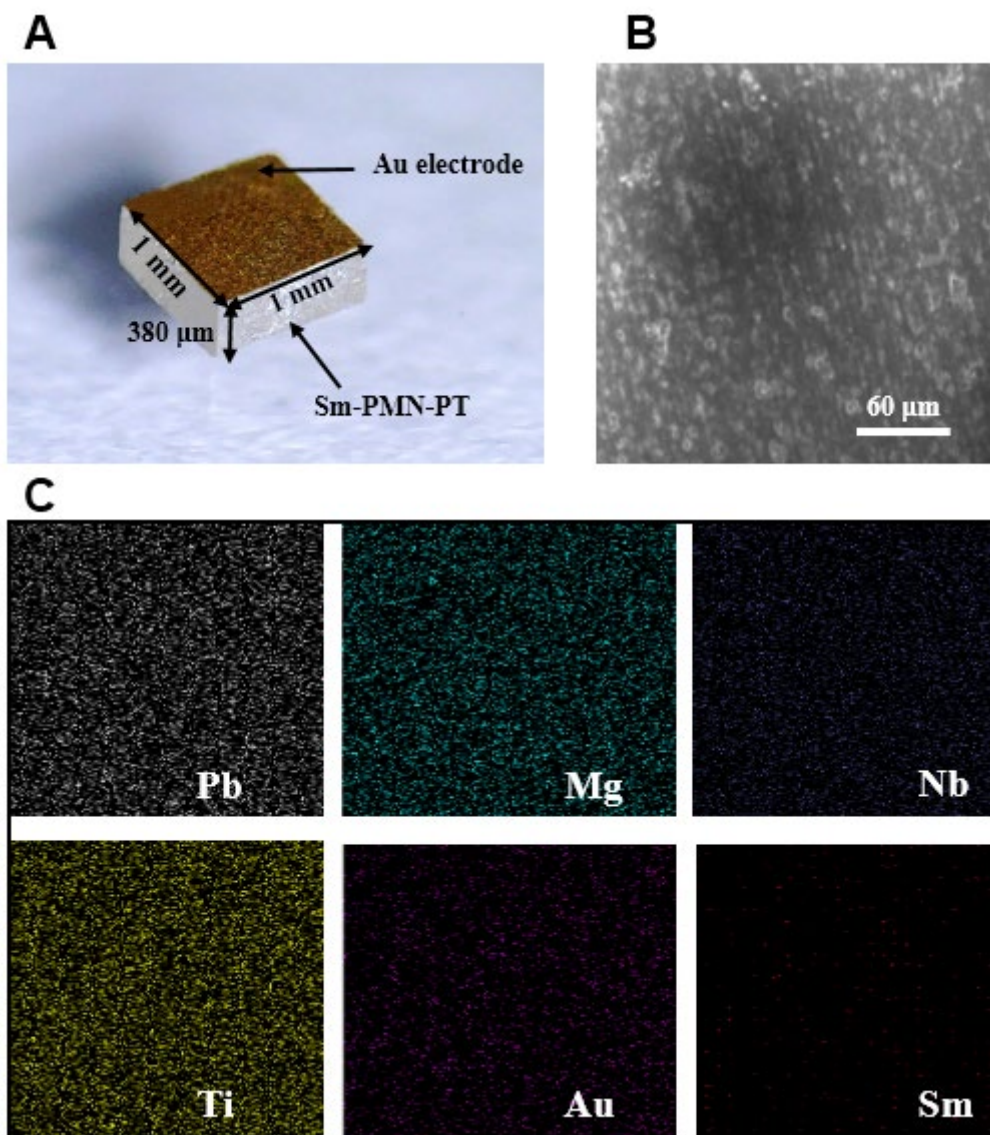

**Fig. S2. Characterization of single Sm-PMN-PT element.** (A) Photo of one element (Sm-PMN-PT). (B) An enlarged view of the surface of one element. (C) Energy dispersive spectroscopy (EDS) elemental mapping images for one element.

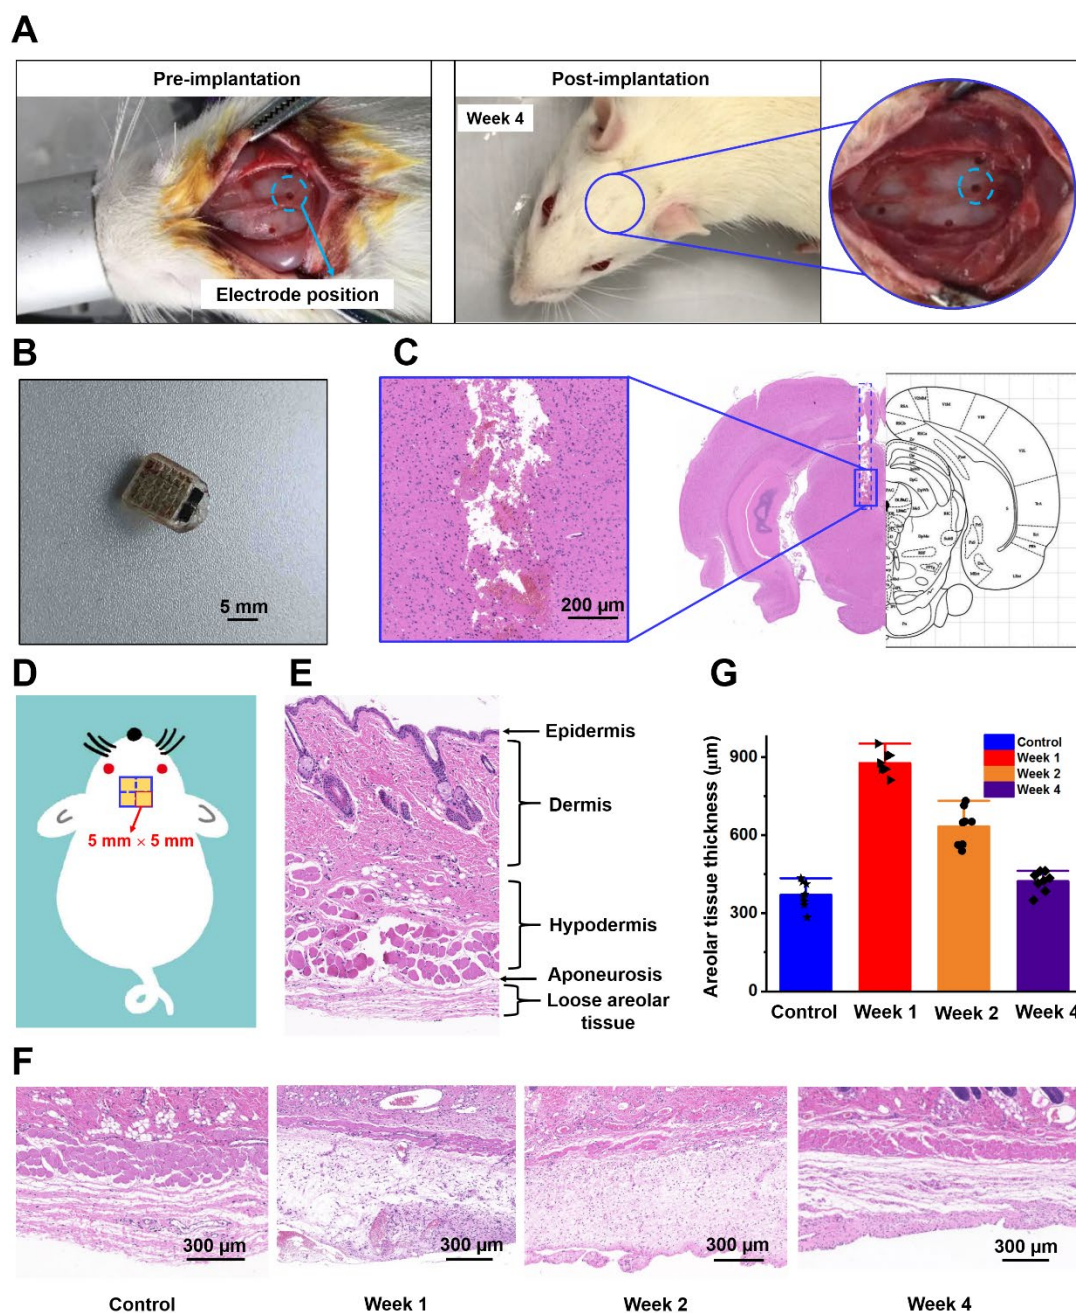

**Fig. S3. Biocompatibility studies for the fully implantable Sm-PUEH device.** (A) Rat scalp status of pre-implantation and post-implantation (4 weeks). (B) The removed Sm-PUEH device. (C) Representative H & E stained brain image of electrode track without obvious tissue damage. (D) Schematic diagram of a rat showing where tissues were taken. (E) Representative skin tissues stained with H & E. (F) Representative H & E stained skin tissue images obtained at 1 week, 2 weeks and 4 weeks after surgery with Sm-PUEH device and a normal skin tissue image (control). (G) Analysis of loose areolar tissue thicknesses, indicating the rats gradually recovered.

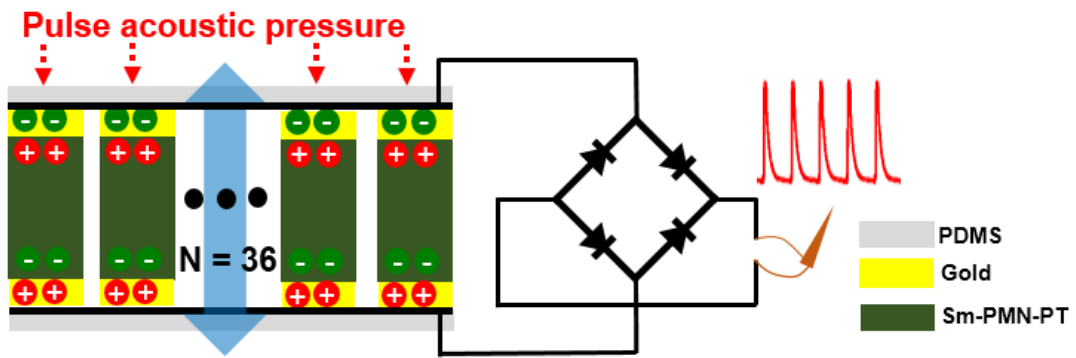

Fig. S4. The circuit diagram of Sm-PUEH device.

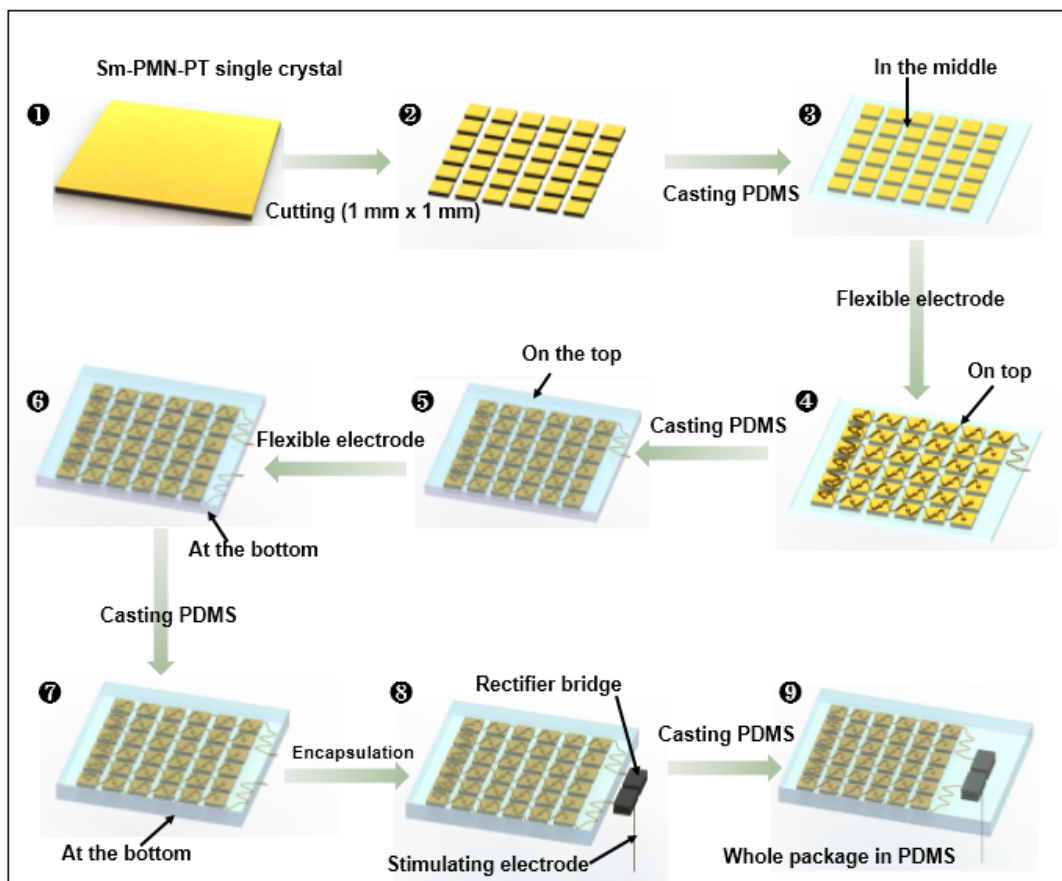

**Fig. S5. Flow chart of Sm-PUEH device fabrication process.**

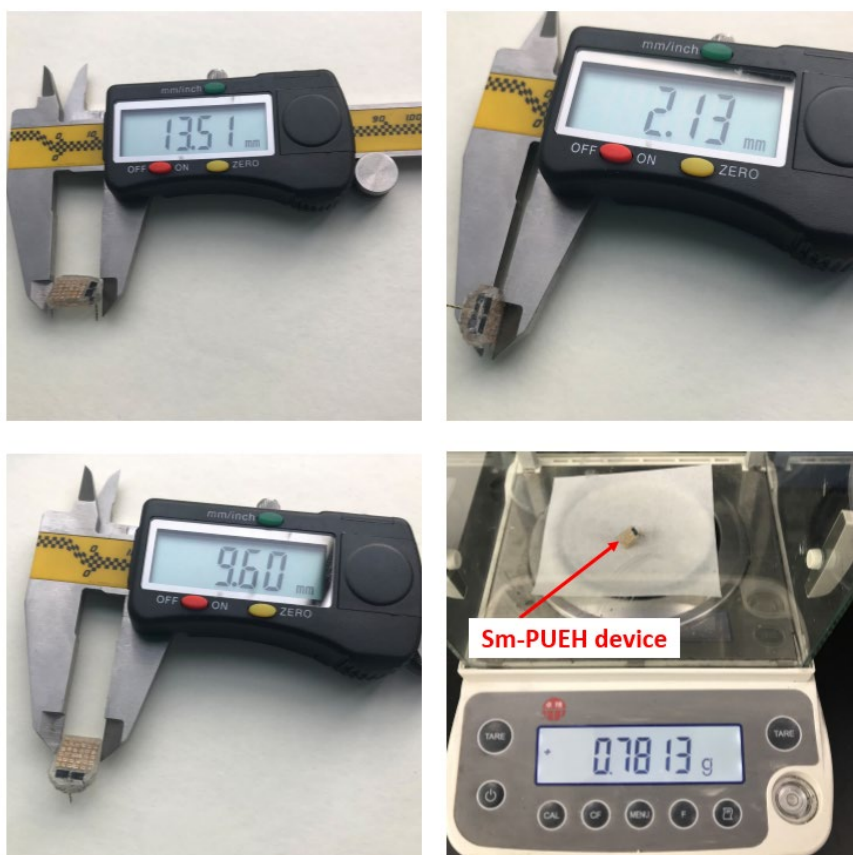

**Fig. S6. Size and mass measurement for Sm-PUEH device.**

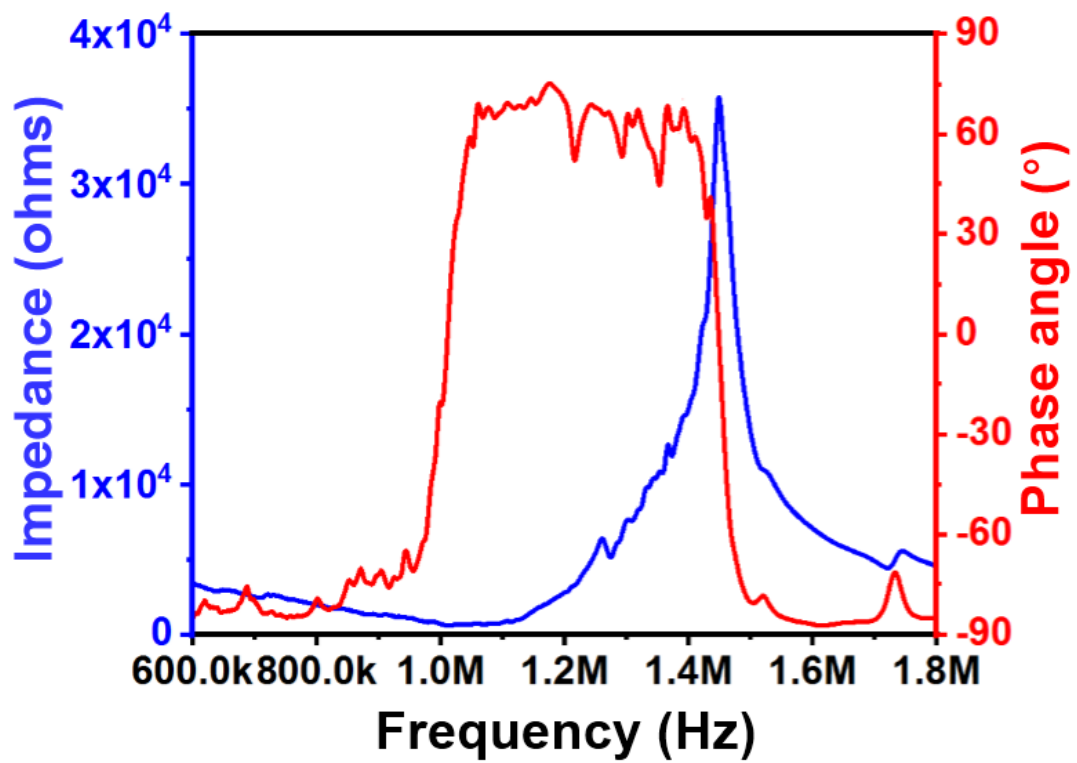

Fig. S7. Electrical impedance and phase angle of one Sm-PMN-PT element.



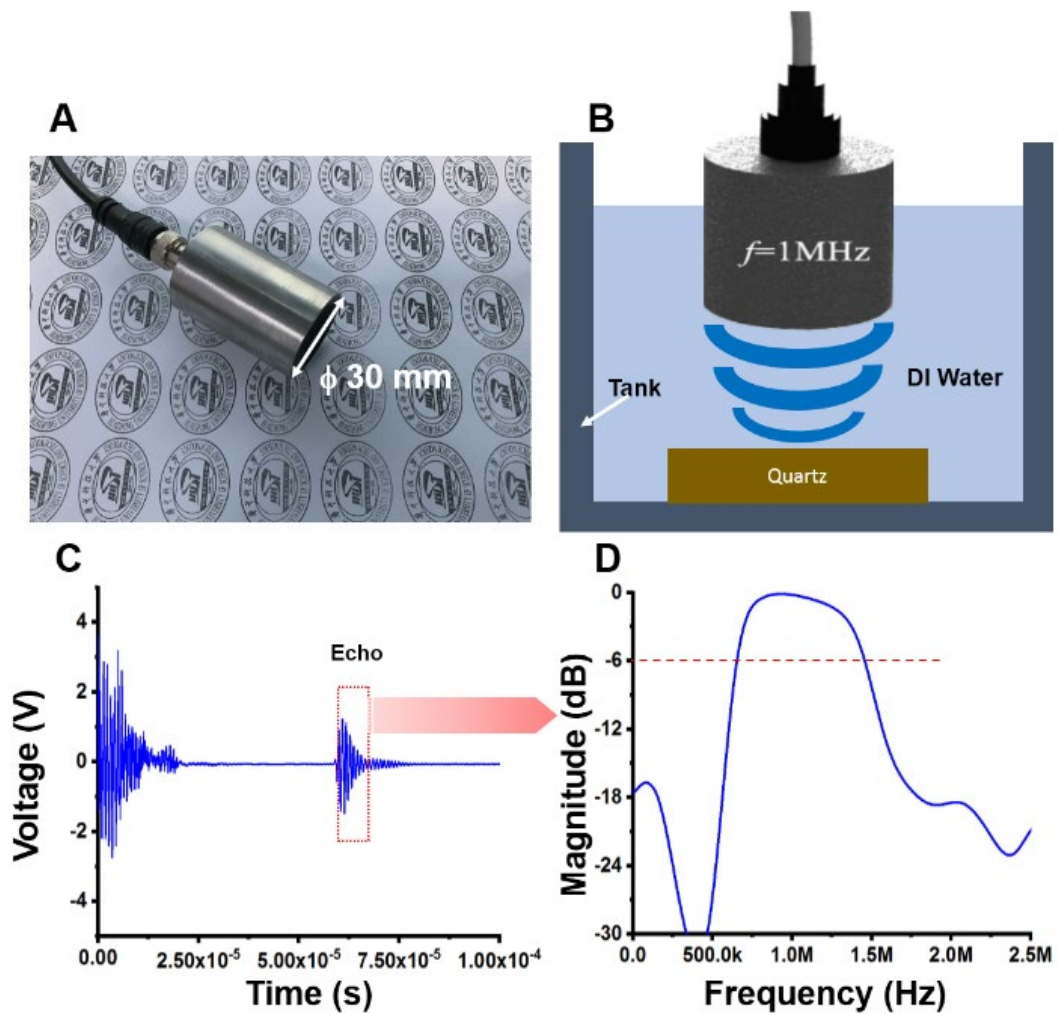

**Fig. S8. Characterization of ultrasound transducer used in this study. (A)** 1 MHz ultrasound transducer (diameter-30 mm) in this work. **(B)** The experimental diagram of the transducer echo test. **(C)** The echo signal of the transducer. **(D)** The frequency gain diagram of the echo signal.

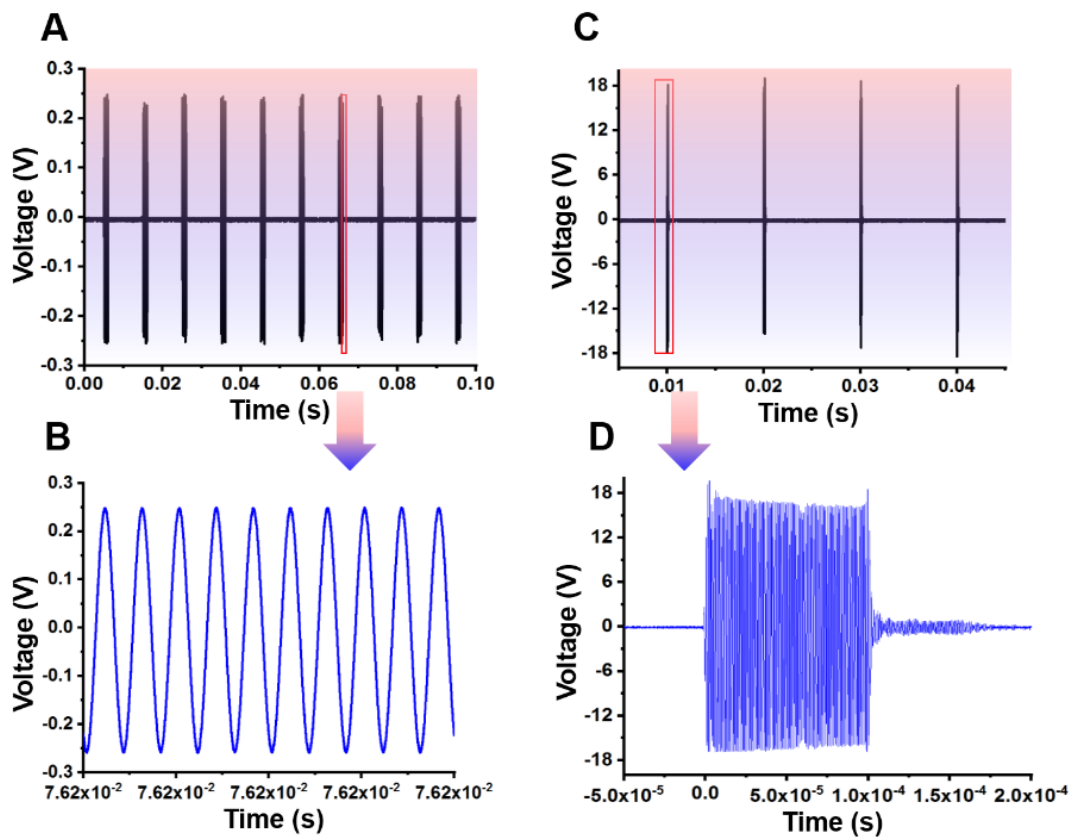

**Fig. S9.** Excitation signal and output signal of Sm-PUEH device. **(A)** Excitation signal of the signal source. **(B)** Partial enlargement of **Fig. S9-A**. **(C)** Output voltage signal of Sm-PUEH device. **(D)** Partial enlargement of output voltage signal of **Fig. S9-C**.

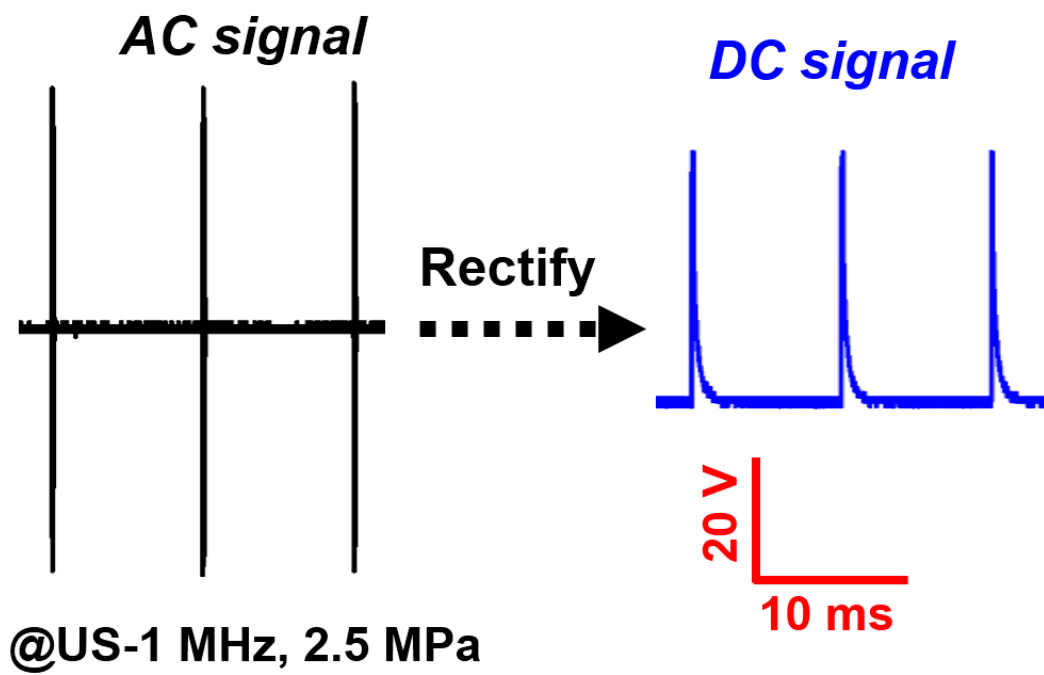

Fig. S10. The AC/DC converting of the output voltage by rectifier circuit.

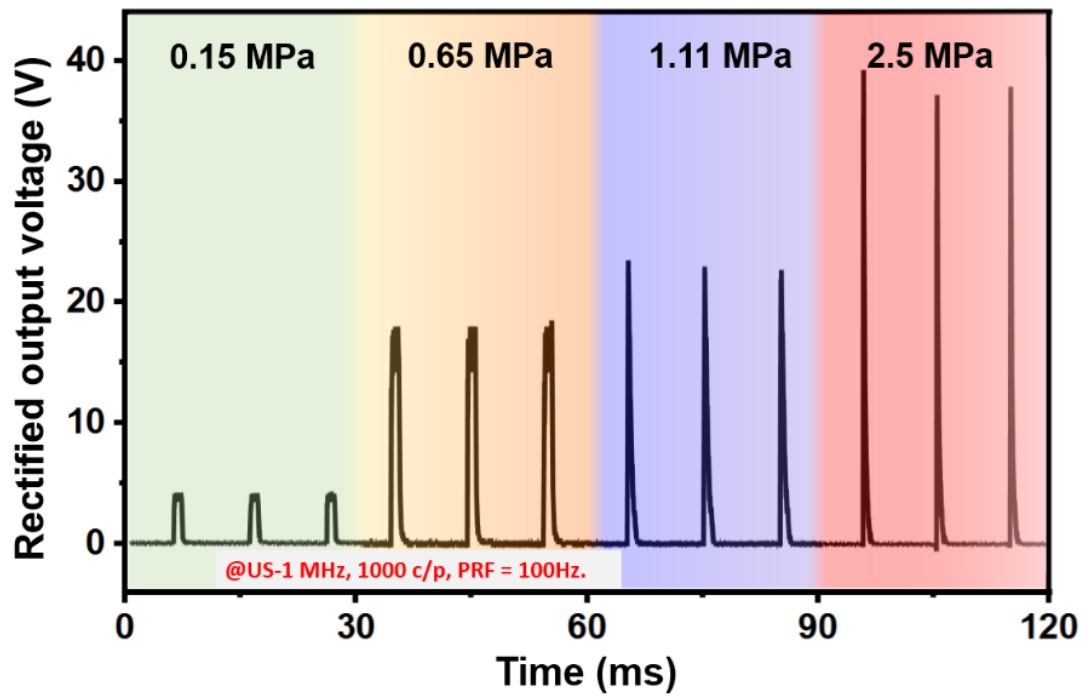

Fig. S11. The rectified output voltage signals of Sm-PUEH device under different ultrasound intensities.

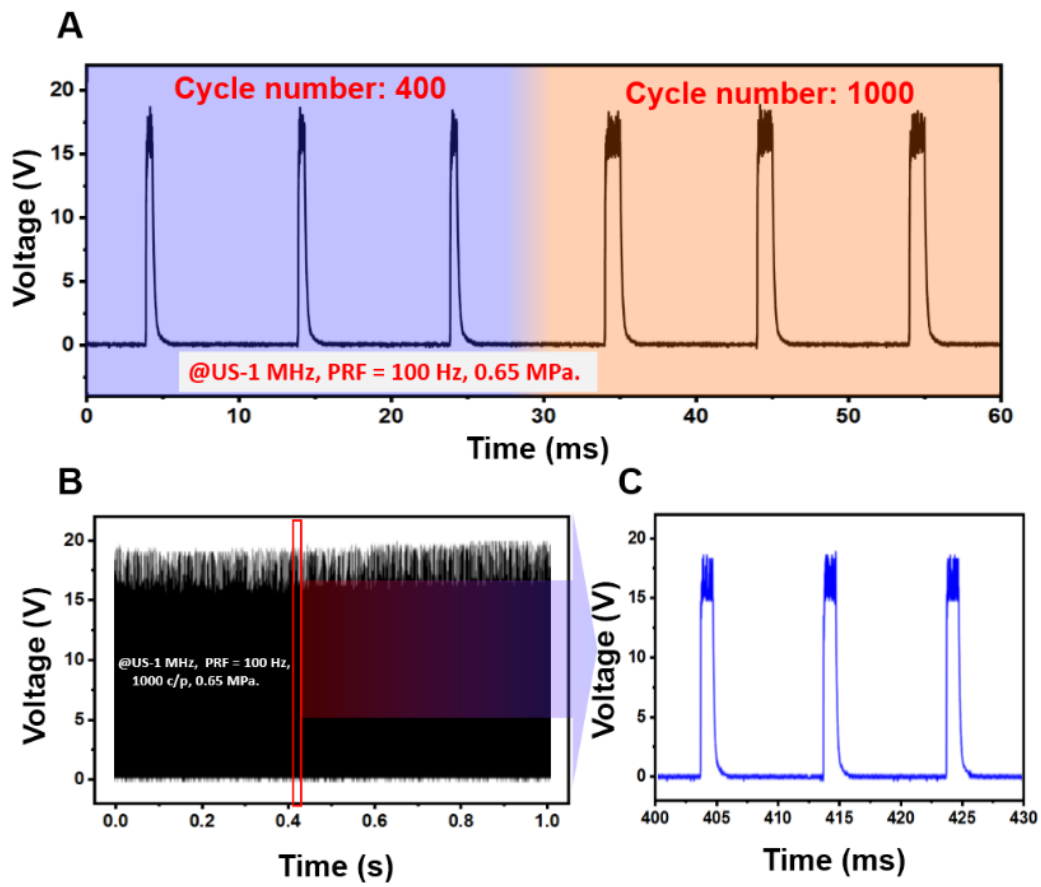

**Fig. S12. Rectified output voltage signals of Sm-PUEH device. (A)** Rectified output voltage signals of Sm-PUEH device with different ultrasound cycle number. **(B)** The stability of output voltage (1 s). **(C)** Partial enlargement in **(B)**-diagram.

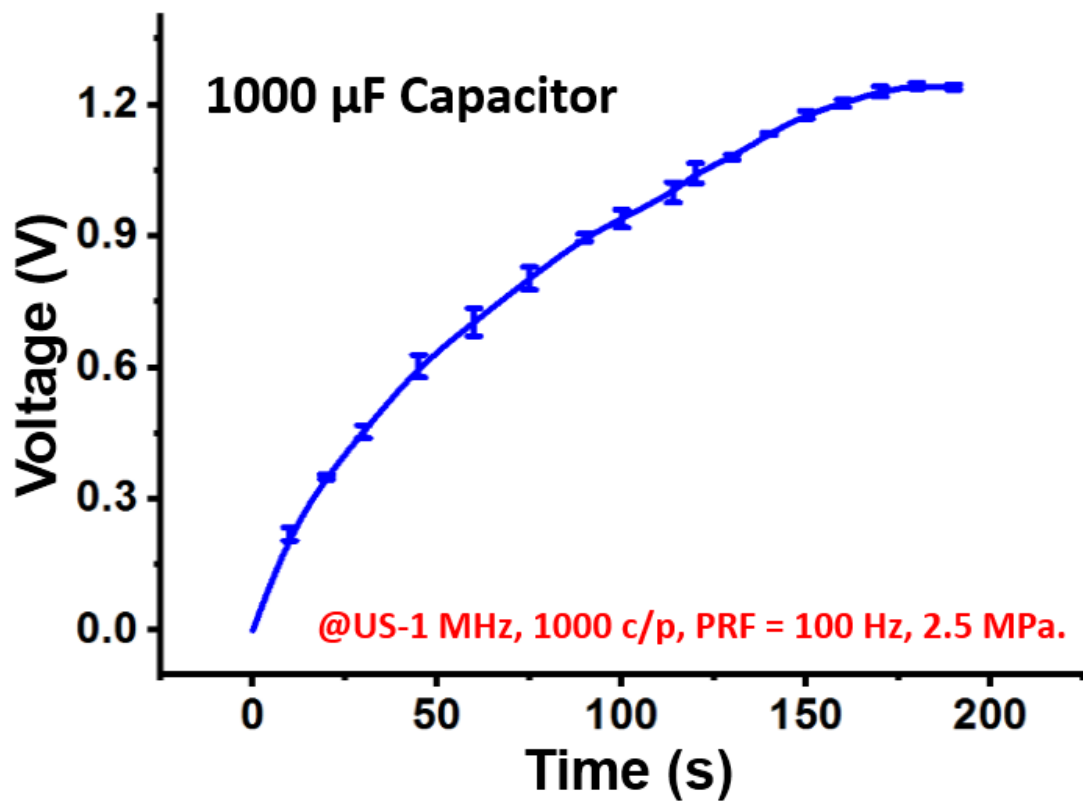

**Fig. S13.** Charging curve of a capacitor (1000 μF) using Sm-PUEH device. The charging voltage reaches the saturation value of 1.25 V within 180 s.

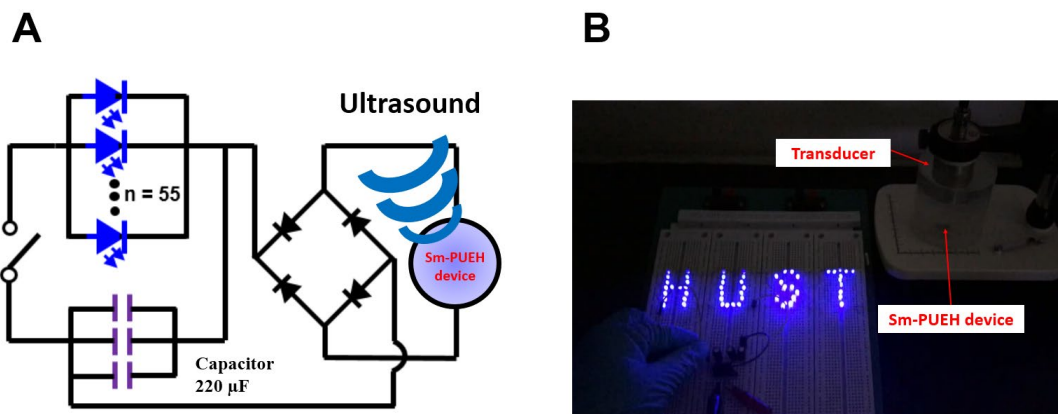

**Fig. S14. Lighting application of Sm-PUEH device after long-time charging. (A)** Schematic diagram for lighting experiment. **(B)** Lighting of 55 blue LEDs with "HUST" pattern after three 220  $\mu\text{F}$  capacitors charged by Sm-PUEH device under an applied ultrasound (US–1 MHz, 1000 c/p, PRF = 100 Hz, 2.5 MPa) for five minutes.

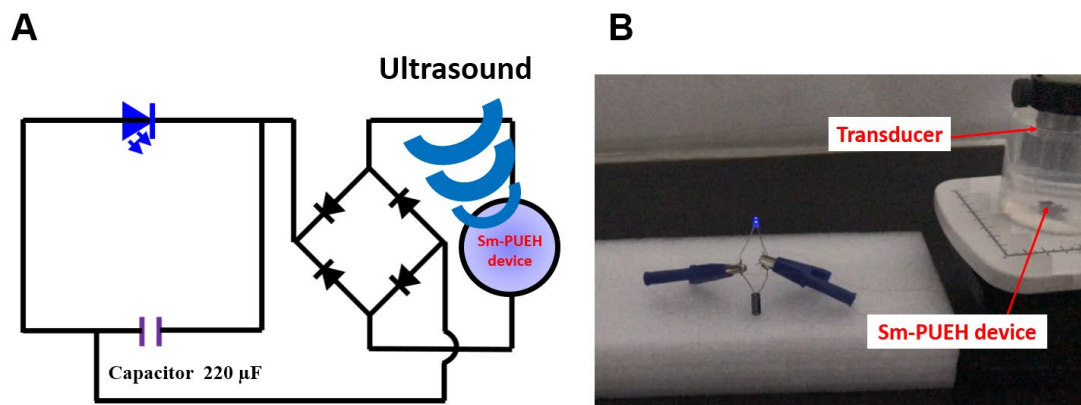

**Fig. S15. Lighting application of Sm-PUEH device after short-time charging. (A)** Schematic diagram for lighting experiment. **(B)** Instant lighting of one blue LED connected with a 220  $\mu\text{F}$  capacitor in parallel charged by Sm-PUEH device under an applied ultrasound (US-1 MHz, 1000 c/p, PRF = 100Hz, 2.5 MPa).



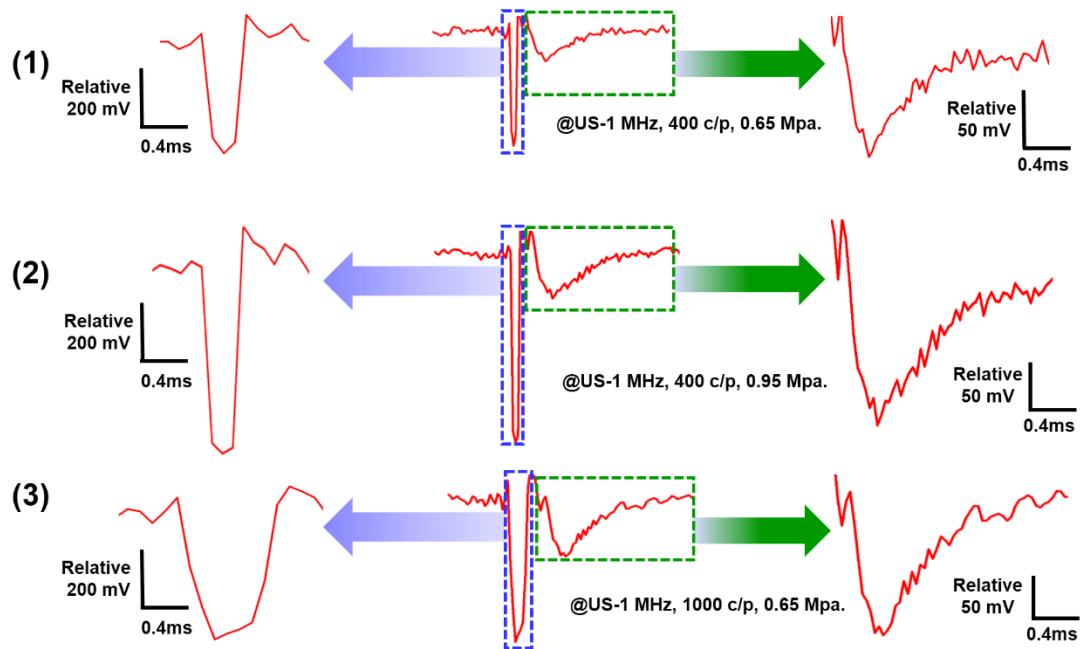

**Fig. S16. The Changes of recorded signals with different stimulating conditions.** The signal in the middle column is the combined signal, where the blue arrow indicates the stimulated signal and the green one is the recorded signal. When the stimulated signal's amplitude is increased (2) or its duration is elevated (3), the amplitude of the recorded signal is enhanced, meanwhile its waveform has no obvious change.

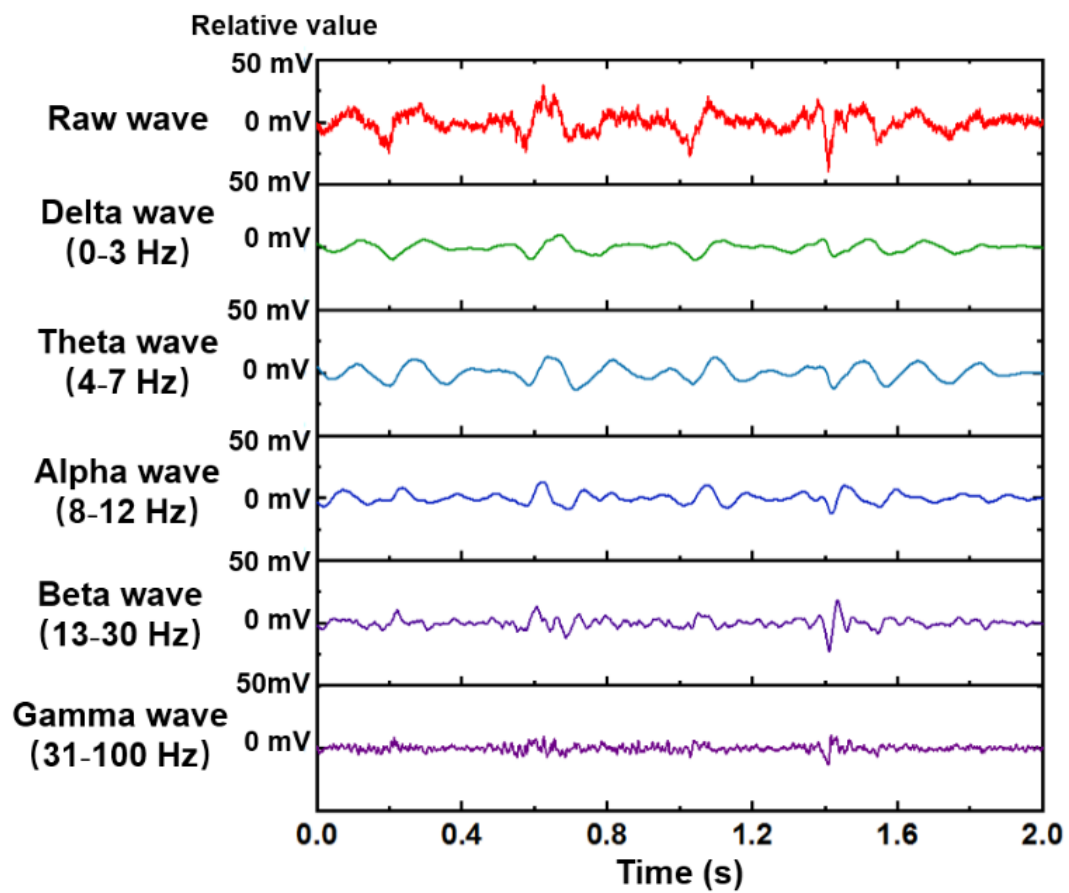

**Fig. S17. Waveforms of the LFP signal in different frequency bands.** From top to bottom are the raw wave, delta (0–3 Hz) wave, theta (4–7 Hz) wave, alpha (8–12 Hz) wave, beta (13–30 Hz) wave, and gamma (31–100 Hz) wave, respectively.

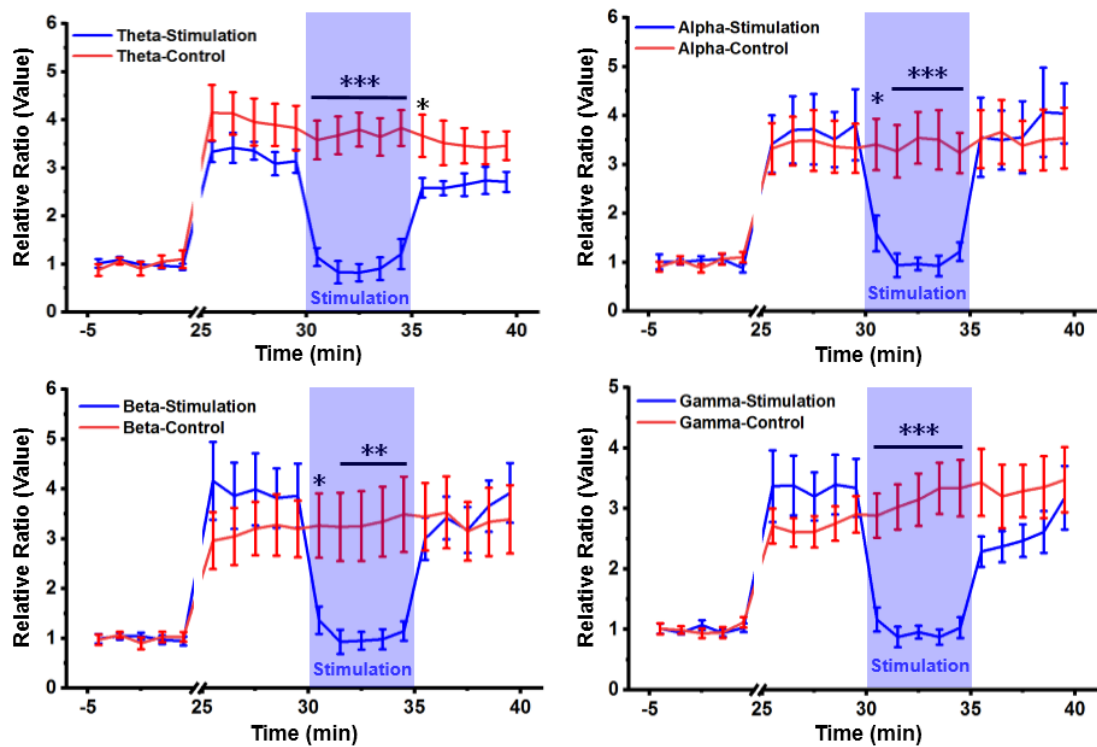

**Fig. S18.** The comparison of power spectrum changes in theta, alpha, beta, and gamma wave between the control group ( $n = 8$ ) and the stimulation group ( $n = 8$ ) after formalin injection. The power spectrum is calculated by the average of each minute, and ratio is processed by the average baseline of the first five minutes. All data are presented as mean  $\pm$  SEM. \* $P < 0.05$ , \*\* $P < 0.01$ , \*\*\* $P < 0.001$ , vs. control group.

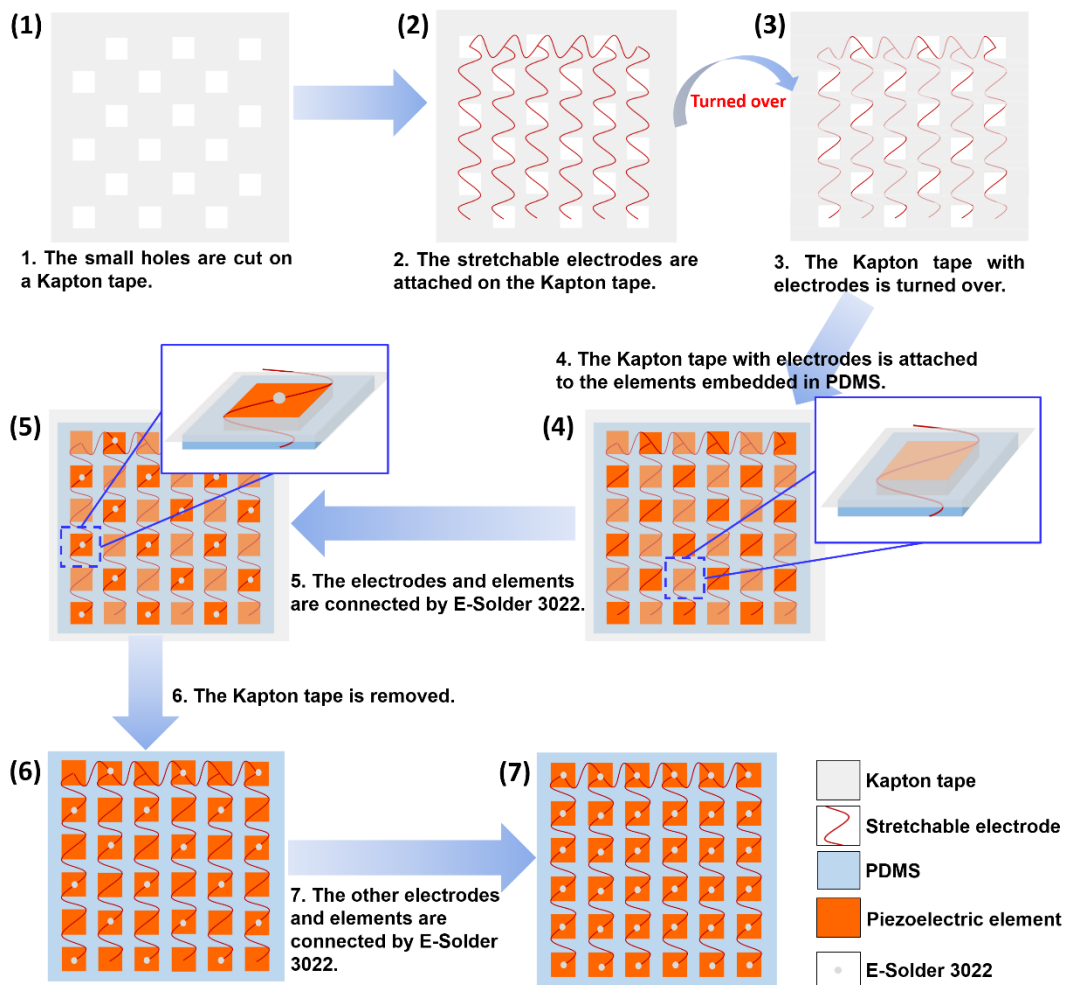

**Fig. S19. Schematic diagram of the method for connecting the stretchable electrodes with piezoelectric elements.**

**Table S1. Comparison of representative wireless power transmission technologies.**

| Technology      | Ref. | Energy source   frequency     | Output   Input                                                         | <i>In vivo</i> or <i>in vitro</i>   | Advantages                                                                             | Drawbacks                                                                  |
|-----------------|------|-------------------------------|------------------------------------------------------------------------|-------------------------------------|----------------------------------------------------------------------------------------|----------------------------------------------------------------------------|
| Electromagnetic | (25) | RF signal   6.78 MHz          | ~ 3.7 V   12.5 W                                                       | <i>in vivo</i>                      | High output power                                                                      | Low threshold; electromagnetic interference; complexity in fabrication     |
|                 | (26) | RF signal   1.6 GHz           | 0.45 mW   800 mW                                                       | <i>in vitro</i>                     |                                                                                        |                                                                            |
|                 | (27) | RF signal   2.34 GHz          | ~ 100 $\mu$ W   2 W                                                    | <i>in vivo</i>                      |                                                                                        |                                                                            |
| Piezoelectric   | (20) | Magneto   250 - 400 kHz       | 2 mW   7 W                                                             | <i>in vivo</i>                      | High output power                                                                      | Complexity in fabrication                                                  |
|                 | (21) | Ultrasound   1.85MHz          | ~400 $\mu$ A   ~ 692 mW/cm <sup>2</sup>                                | <i>in vivo</i>                      | High penetration depth; high safety threshold                                          | Low output power; long-term charging                                       |
| Triboelectric   | (28) | Ultrasound   20 kHz           | 98.6 $\mu$ W   1 W/cm <sup>2</sup>                                     | <i>in vitro</i>                     | High output power                                                                      | Complexity in fabrication                                                  |
|                 | (29) | Peristalsis stomach   0.05 Hz | 100 mV   -                                                             | <i>in vivo</i>                      | Regenerative                                                                           | Low output power; long- term charging                                      |
|                 | (30) | Body motion   -               | <sup>B</sup> 360 mV   0.4 m/s                                          | <i>in vivo</i>                      |                                                                                        |                                                                            |
| Electrostatic   | (31) | Ultrasound   25 kHz           | 24.7 nW   -                                                            | <i>in vitro</i>                     | -                                                                                      | Low output power; few implantation                                         |
|                 | (32) | Heart beat   1-2 Hz           | 20 $\mu$ J   -                                                         | <i>in vitro</i>                     | Regenerative                                                                           |                                                                            |
|                 | (33) | Ultrasound   1 MHz            | 27 mV   1.2 W/cm <sup>2</sup>                                          | <i>in vitro</i>                     | -                                                                                      |                                                                            |
| Bio-Fuel cell   | (34) | Enzymatic catalysis   -       | 0.42 V   16 $\mu$ W/mL                                                 | <i>in vivo</i>                      | Recycle materials                                                                      | Low output power                                                           |
|                 | (35) | Enzymatic catalysis   -       | ~4.4 $\mu$ W   PH = 6.2                                                | <i>in vitro</i>                     |                                                                                        |                                                                            |
| Thermoelectric  | (36) | Temperature gradient   -      | 645 $\mu$ W   $\Delta$ T = 3.5 K                                       | <i>in vivo</i>                      | Regenerative; unlimited lifetime                                                       | Low instantaneous output power                                             |
|                 | (37) | Temperature gradient   -      | 1 $\mu$ W   $\Delta$ T = 5 K                                           | <i>in vitro</i>                     |                                                                                        |                                                                            |
| Photovoltaic    | (38) | Near-infrared light   -       | ~10.3 mW   ~ 3.3 W/cm <sup>2</sup>                                     | <i>in vivo</i>                      | Regenerative                                                                           | Low instantaneous output power; long- term charging; low penetration depth |
|                 | (39) | Light   -                     | 0.27 V   298.15 K                                                      | <i>in vitro</i>                     |                                                                                        |                                                                            |
| This work       | -    | Ultrasound   1MHz             | 280 $\mu$ W   212 mW/cm <sup>2</sup><br>7.7 V   212 mW/cm <sup>2</sup> | <i>in vivo</i> /<br><i>in vitro</i> | High penetration depth; high safety threshold; high output power; good controllability | -                                                                          |

<sup>B</sup> Estimated based on published data.

**Table S2. Comparison of representative piezoelectric materials for PUEH.**

| Ref.      | Materials | Size (mm <sup>2</sup> ) | Frequency | Input condition                      | Medium   | Output condition                | Output power density                      | $\eta$              |
|-----------|-----------|-------------------------|-----------|--------------------------------------|----------|---------------------------------|-------------------------------------------|---------------------|
| (41)      | PVDF      | <sup>B</sup> 300        | 14 MHz    | 2.05 mW                              | In water | <sup>B</sup> load 64 K $\Omega$ | <sup>B</sup> 76.7 $\mu$ W/cm <sup>2</sup> | –                   |
| (42)      | PZT       | 2.058                   | 240 KHz   | 1 mW/cm <sup>2</sup>                 | In water | load 50 $\Omega$                | 3.75 $\mu$ W/cm <sup>2</sup>              | <sup>B</sup> 0.375% |
| (43)      | PZT 1-3   | <sup>B</sup> 314        | 970 KHz   | –                                    | In air   | load 100 $\Omega$               | <sup>B</sup> 60 mW/cm <sup>2</sup>        | –                   |
| (44)      | PZT 1-3   | <sup>B</sup> 5402       | 350 KHz   | 65 mW/cm <sup>2</sup>                | In water | –                               | 4.1 $\mu$ W/cm <sup>2</sup>               | <sup>B</sup> 0.063% |
| (45)      | KNN 1-3   | <sup>B</sup> 1          | 304 KHz   | <sup>B</sup> 5.887 W/cm <sup>2</sup> | In water | load 1 K $\Omega$               | 45 mW/cm <sup>2</sup>                     | <sup>B</sup> 0.76%  |
| This work | Sm-PMN-PT | 36                      | 1 MHz     | 20.3 W/cm <sup>2</sup>               | In water | load 1 K $\Omega$               | 1.1 W/cm <sup>2</sup>                     | 5.4%                |

<sup>B</sup> Estimated based on published data.

The conversion coefficient ( $\eta$ ) is defined as:

$$\eta = \frac{E_{out}}{E_{in}} \times 100\%,$$

where  $E_{out}$  is output energy and  $E_{in}$  is input energy.

**Table S3. Comparison of representative wireless charging devices.**

| Ref.                                             | (25)             | (21)                      | (29)                | (34)                | (36)                 | (38)                     | This work              |
|--------------------------------------------------|------------------|---------------------------|---------------------|---------------------|----------------------|--------------------------|------------------------|
| Principle of technology                          | Electromagnetic  | Piezoelectric             | Triboelectric       | Bio-Fuel cell       | Thermoelectric       | Photovoltaic             | Piezoelectric          |
| Power type (implant)                             | RF antenna       | Ultrasound                | Peristalsis stomach | Enzymatic catalysis | Temperature gradient | Near-infrared light      | Ultrasound             |
| Implantable? (Fully or half)                     | Fully            | Fully                     | Fully               | Fully               | Half                 | Fully                    | Fully                  |
| Animal type                                      | Rat              | Rat                       | Rat                 | Rabbit              | Rat                  | Mice                     | Rat                    |
| Stimulation type                                 | LED              | Electrical                | Electrical          | Electrical          | Electrical           | LED                      | Electrical             |
| Implantation site                                | Head             | Leg                       | Surface of stomach  | Abdomen             | Head                 | Head / back              | Head                   |
| Stimulus site                                    | Brain            | Sciatic nerve             | Vagus               | -                   | -                    | Brain                    | Brain                  |
| Stimulation effect                               | Activity control | Muscle activation         | Weight control      | -                   | -                    | Whisker movement         | Analgesia              |
| Carrier frequency                                | 6.78 MHz         | 1.85 MHz                  | 0.05 – 2 Hz         | -                   | -                    | 38 KHz                   | 1 MHz                  |
| Stimulation frequency (Hz)                       | 5 – 40 Hz        | 0–5,000 Hz                | 0.05 – 2 Hz         | -                   | -                    | -                        | 0–120 Hz               |
| Stimulation frequency adjustable?                | Yes              | Yes                       | No                  | -                   | -                    | Yes                      | Yes                    |
| Operation control                                | Bluetooth        | External ultrasound       | Peristalsis stomach | Bluetooth           | -                    | Modulated light          | External ultrasound    |
| Battery or rechargeable?                         | Yes              | Yes                       | No                  | Yes                 | -                    | Yes                      | No                     |
| Immediate stimulation?                           | No               | No                        | No                  | No                  | No                   | No                       | Yes                    |
| Verify biosafety?                                | Yes              | No                        | Yes                 | Yes                 | No                   | No                       | Yes                    |
| Whole implant size (mm)                          | 19 × 12 × 5      | 1.7 mm <sup>3</sup>       | 16 × 12 × 2.5       | -                   | 83 mm <sup>2</sup>   | 25 × 17 (large part)     | 13.5 × 9.6 × 2.1       |
| Freely moving (y/n)                              | Yes              | No                        | Yes                 | Yes                 | No                   | No                       | Yes                    |
| Implant weight (g)                               | 1.4              | 0.0064                    | ~ 0.8               | -                   | -                    | -                        | 0.7                    |
| Out performance ( <i>in vivo</i> )               | ~ 3.7 V          | 50 μA – 400 μA            | ~ 200 μV            | 0.42 V              | 645 μW               | ~10.3 mW                 | 400 μW (Max)           |
| Instantaneous effective power ( <i>in vivo</i> ) | -                | -                         | -                   | -                   | -                    | -                        | 280 μW                 |
| Input power                                      | 12.5 W           | ~ 692 mW/ cm <sup>2</sup> | N/A                 | 16 μW/mL            | ΔT– 3.5 K            | ~ 3.3 W/ cm <sup>2</sup> | 212 mW/cm <sup>2</sup> |

**Table S4. Parameters of Sm-PMN-PT.**

| Parameters                                            | Value                  |
|-------------------------------------------------------|------------------------|
| Piezoelectric coefficient $d_{33}$                    | 4000 pC/N              |
| Electromechanical coupling coefficient $k_{33}$       | 95%                    |
| Relative free permittivity $\epsilon_{33}/\epsilon_0$ | 13000                  |
| Dielectric loss $\tan \delta$                         | 0.005                  |
| Thickness $h$                                         | 0.38 mm                |
| Density $\rho$                                        | 8100 kg/m <sup>3</sup> |
| Acoustic velocity $c_p$                               | 4400 m/s               |
| Acoustic impedance $Z_a$                              | 36 MRayls              |



**Table S5. Simulation parameters of ultrasound penetrating Skull (51).**

| Parameters                                  | Value         |
|---------------------------------------------|---------------|
| Ultrasound frequency                        | 0.5 MHz/1 MHz |
| Density of skin(g/cm <sup>3</sup> )         | 1.15          |
| Density of Skull(g/cm <sup>3</sup> )        | 1.9           |
| Density of Brain(g/cm <sup>3</sup> )        | 1.03          |
| Speed of Sound in Skin(m/sec)               | 1730          |
| Speed of longitudinal waves in Skull(m/sec) | 4080          |
| Speed of shear waves in Skull(m/sec)        | 2800          |
| Speed of Sound in Brain(m/sec)              | 1550          |
| Attenuation in Skin[dB/(cm MHz)]            | 1.84          |
| Attenuation in Brain[dB/(cm MHz)]           | 0.8           |

**Table S6. Parameters of ultrasound energy harvesters.**

| Ref.      | UEH device          | Size (mm <sup>2</sup> ) | Frequency | Input condition | Medium   | Output condition<br>$C_s$ (μF) | $T$ (s) | $V_o$ (V)         | $\bar{P}$ (nW) |
|-----------|---------------------|-------------------------|-----------|-----------------|----------|--------------------------------|---------|-------------------|----------------|
| (31)      | Omnidirectional UEH | <sup>B</sup> 7.4        | 25 kHz    | 60 V            | In air   | 1                              | 15      | 0.86              | 24.7           |
| (44)      | PZT(1-3) PUEH       | <sup>B</sup> 5402       | 35 kHz    | 150 V           | In water | 1000                           | 900     | 0.27              | 40             |
| (45)      | LF-PUEH             | <sup>B</sup> 1          | 3.4 kHz   | 100 V           | In water | 220                            | 200     | 0.54              | 160.38         |
| (56)      | 2-D MEMS UEH        | <sup>B</sup> 1          | 38.53 kHz | 60 V            | In air   | 1                              | 15      | <sup>B</sup> 0.44 | 21.4           |
| (57)      | 3-D MEMS UEH        | <sup>B</sup> 6.25       | 36 kHz    | 100 V           | In air   | 1                              | 20      | 0.71              | 12.6           |
| This work | Sm-PUEH             | 36                      | 1 MHz     | 150 V           | In water | 1000                           | 180     | 1.25              | 4270 ± 40      |

<sup>B</sup> Estimated based on published data.

The average charging power ( $\bar{P}$ ) is calculated by the following formula (31):

$$\bar{P} = \frac{C_s V_o^2}{2T}$$

where  $f$  is the ultrasound working frequency,  $C_s$  is the capacitance,  $T$  is the charging time, and  $V_o$  is the effective output voltage.

**Table S7. US waveform properties used in animals in this work**

| $f$ (MHz) | C/P | PRF (Hz) | Pr (MPa) | $I_{SPTA}$ (mW/cm <sup>2</sup> ) | MI   | *Safe or not |
|-----------|-----|----------|----------|----------------------------------|------|--------------|
| 1         | 400 | 50       | 0.65     | 212.25                           | 0.65 | safe         |
| 1         | 400 | 75       | 0.65     | 318.375                          | 0.65 | safe         |
| 1         | 400 | 100      | 0.65     | 424.5                            | 0.65 | safe         |
| 1         | 400 | 125      | 0.65     | 531                              | 0.65 | safe         |
| 1         | 400 | 150      | 0.65     | 636.75                           | 0.65 | safe         |

$$I_{SPTA} = \int \frac{P^2(t)}{Z_0} dt \times PRF$$

Where  $P$  is the instantaneous peak pressure;  $Z_0$  is the characteristic acoustic impedance in Pa s/m, which is defined as  $Z_0 = \rho c$ ; where  $\rho$  is the density of the medium, and  $c$  is the speed of sound in the medium (Skin: 1.15g/cm<sup>3</sup>, 1730m/s in this work) (72).

$$MI = \frac{p_r}{\sqrt{f}}$$

wherein  $p_r$  is the peak negative pressure of the US in MPa, and  $f$  is the center frequency of the US transducer in MHz (72).

**\*Safe or not:** According to the Food and Drug Administration (FDA)'s regulation, the safety threshold of ultrasound in the human body is 720 mW/cm<sup>2</sup> (23).

### Note S1: Theoretical analysis of excellent power output of Sm-PUEH device

In this work, the width-to-thickness ratio of the single element in this device we designed is about 2.63 ( $1000 \mu\text{m} / 380 \mu\text{m} \approx 2.63$ ). Based on the output power theory of a piezoelectric harvester in thickness-stretch mode of a plate (48), we explore the huge advantages of output power based on Sm-PMN-PT single crystal.

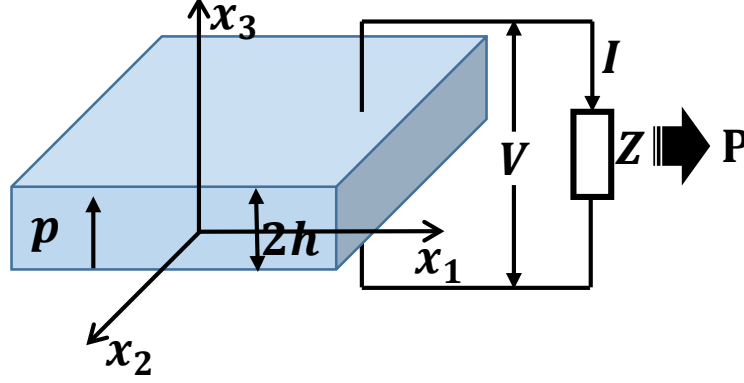

**Fig.Note-S1.** Schematic diagram of a plate in thickness-stretch mode, where  $\mathbf{p}$  is the Stress amplitude,  $\mathbf{Z}$  is Load,  $I$  is output current,  $V$  is the output voltage and  $\mathbf{P}$  is the output power. Among them,  $T_{33} = p \exp(i\omega t)$ , and  $T_{31} = T_{32} = 0$ .

According to the governing formulas of three-dimensional linear piezoelectricity (47), the formulas of the plate can be obtained as follows:

$$T_{11} = T_{22} = c_{13}u_{3,3} + e_{31}\phi_{,3}; \quad (1)$$

$$T_{33} = c_{33}u_{3,3} + e_{31}\phi_{,3}; \quad (2)$$

$$D_3 = e_{33}u_{3,3} - \varepsilon_{33}\phi_{,3}; \quad (3)$$

$$S_{33} = u_{3,3}; \quad (4)$$

$$E_3 = -\phi_{,3}; \quad (5)$$

where  $u$  the mechanical displacement vector,  $T$  is the stress tensor,  $S$  is the strain tensor,  $E$  is the electric field vector,  $D$  is the electric displacement vector, and  $\phi$  is the electric potential;  $c$ ,  $e$ , and  $\varepsilon$  are the elastic, piezoelectric, and dielectric coefficient.

By solving the partial differential formulas of the above formula (1), (2), (3), (4), (5), it can be obtained:

$$I = i\omega p \frac{\varepsilon_{33}}{e_{33}} \frac{1}{\left(1 + \frac{1}{k_{33}^2}\right)} \frac{1}{\left(1 + \frac{Z}{Z_0}\right) \xi h \cot(\xi h) - \bar{k}_{33}^2} \quad (6)$$

$$V = i\omega p \frac{\varepsilon_{33}}{e_{33}} \frac{1}{\left(1 + \frac{1}{k_{33}^2}\right)} \frac{Z}{\left(1 + \frac{Z}{Z_0}\right) \xi h \cot(\xi h) - \bar{k}_{33}^2} \quad (7)$$

$$\mathbf{P} = \frac{1}{2} |I|^2 \text{Re}\{Z\} = \frac{\omega^2 p^2 \varepsilon_{33} |\bar{k}_{33}^2|}{2 |\bar{c}_{33}|} \text{Re}\{Z\} \left| \frac{1}{\left(1 + \frac{Z}{Z_0}\right) \xi h \cot(\xi h) - \bar{k}_{33}^2} \right|^2 \quad (8)$$

where  $k_{33}^2 = \frac{e_{33}^2}{\varepsilon_{33}c_{33}}$ ,  $\bar{k}_{33}^2 = \frac{k_{33}^2}{1+k_{33}^2}$ ,  $\bar{c}_{33} = c_{33}(1+k_{33}^2)$ ,  $\xi^2 = \frac{\rho}{c_{33}(1+k_{33}^2)}$ . In the above formulas,  $p$  is the acoustic pressure amplitude applied on the upper surface of the harvester,  $Z$  is the load and  $Z_0$  is the internal resistance.  $c_{33}$ ,  $e_{33}$  and  $\varepsilon_{33}$  are the effective elastic coefficient, the piezoelectric coefficient, and dielectric coefficient;  $h$ ,  $\rho$ ,  $\omega$  and  $\xi$  are the thickness, the effective mass density, angular frequency, and wave number.

Only considering the material parameters, we simplify the above formula (8):

$$P \propto \frac{\varepsilon_{33}}{c_{33}} \frac{1}{(k_{33} + \frac{1}{k_{33}})^2} \quad (9)$$

The value of  $k_{33}$  is in the range of 0–1, so the formula  $\frac{1}{(k_{33} + \frac{1}{k_{33}})^2}$  is a monotonically increasing function. Therefore, according to the formula (9), a larger dielectric coefficient ( $\varepsilon_{33}$ ), and a larger electromechanical coupling coefficient ( $k_{33}$ ) help to increase the output power. Of course, the maximum output power can be obtained at the resonance frequency.

In this work, Sm-PUEH device we designed works at the resonant frequency (1MHz, **Fig. S7**), and the Sm-PMN-PT single crystal has a larger relative free permittivity and electromechanical coupling coefficient ( $\varepsilon_{33}/\varepsilon_0 = 13000$ ,  $k_{33} = 95\%$ , **Table S4**).

## **Captions for Supplementary Movies**

### **Movie S1**

High voltage output (80 V<sub>pp</sub>) of Sm-PUEH device under pulse ultrasound (US–1 MHz, 2.5 MPa).

### **Movie S2**

The voltage output of Sm-PUEH device with incident angle of 30° under pulse ultrasound (US–1 MHz, 2.5 MPa).

### **Movie S3**

The voltage output of Sm-PUEH device in the bent state under pulse ultrasound (US–1 MHz, 2.5 MPa).

### **Movie S4**

The charging of a capacitor (470 μF) by Sm-PUEH device under pulse ultrasound (US–1 MHz, 1000 c/p, PRF = 100 Hz, 2.5 MPa).

### **Movie S5**

Lighting of 55 blue LEDs with "*HUST*" pattern after three 220 μF capacitors charged by Sm-PUEH device under pulse ultrasound (US–1 MHz, 1000 c/p, PRF = 100 Hz, 2.5 MPa) for five minutes.

### **Movie S6**

Instant lighting of one blue LED connected with a 220 μF capacitor in parallel charged by Sm-PUEH device under pulse ultrasound (US–1 MHz, 1000 c/p, PRF = 100Hz, 2.5 MPa).

### **Movie S7**

The output voltage of Sm-PUEH device in pork tissue under pulse ultrasound (US–1 MHz, 0.65 MPa).

### **Movie S8**

Behavioral experiment of analgesia application. The fully implanted Sm-PUEH device achieves analgesia under pulse ultrasound (US–1 MHz, 400 c/p, PRF = 50 Hz, 0.65 MPa).

### **Movie S9**

Biocompatibility study of Sm-PUEH device after long-term implantation.
